# Supplementary material
Source: PubMed Central journal article supplement (PMC2785636)
Supplement: supp_M109.019174_jbc.M109.019174-1.pdf [file supp_M109.019174_jbc.M109.019174-1.pdf]

## Supplemental Data

### Homologous Recombination but not Nucleotide Excision Repair Plays a Pivotal Role in Tolerance to DNA-Protein Crosslinks in Mammalian Cells

Toshiaki Nakano, Atsushi Katafuchi, Mayumi Matsubara, Hiroaki Terato, Tomohiro Tsuboi, Tasuku Masuda, Takahiro Tatsumoto, Seung Pil Pack, Keisuke Makino, Deborah L. Croteau, Bennett Van Houten, Kenta Iijima, Hiroshi Tauchi, and Hiroshi Ide

#### SUPPLEMENTAL EXPERIMENTAL PROCEDURES

*Preparation of 150OXA-DPCs*—150OXA-DPCs were prepared using two methods (Fig. S1A). In method I for DPCs containing small CLPs (Table S1), proteins were crosslinked to oxanine in 60OXA as described previously (1). The resulting products containing DPCs (60OXA-DPCs) were ligated to 50-mer L1 and 40-mer L2 using 20-mer scaffolds (S1 and S2) and T4 DNA ligase. 150OXA-DPCs were purified by 6% denaturing PAGE. In method II for DPCs containing large CLPs (Table S1), 60OXA was ligated to L1 and L2 to prepare 150OXA. Proteins were crosslinked to oxanine in 150OXA, and the resulting products containing DPCs (150OXA-DPCs) were purified by 10% SDS-PAGE. 150OXA-DPC containing NEIL1 was also digested exhaustively with trypsin or partially with *Acromobacter* protease I to prepare additional DPC substrates. Typical gel separation data of 150OXA-DPCs after crosslinking reactions or protease digestion are shown in Fig. S1B.

*Cells*—Cells, relevant mutations in repair genes, and sources are summarized in Table S2.

*Transfection of GFP Plasmid*—pcDNA-EGFP used for transfection assays was a derivative of pcDNA3.1/myc-His A MCS (Invitrogen), and a fragment containing the CMV promoter and the EGFP gene was inserted at the *NdeI/XhoI* site (N. Sakamoto unpublished data). MG132 (CALBIOCHEM) was initially dissolved in DMSO at a concentration of 42 mM and added to culture media (DMEM or DMEM + 10% FBS) to final concentrations of 0 (*i.e.*, DMSO alone), 0.5, and 2  $\mu$ M. The transfection solution containing the Lipofectin Reagent (Invitrogen), pcDNA-EGFP, and DMEM (without or with MG132) was reconstituted as recommended by Invitrogen. WI38VA13 cells ( $1 \times 10^5$  cells) were plated in a 35 mm dish and incubated in DMEM + 10% FBS for 10 h in a 5% CO<sub>2</sub> atmosphere. The medium was changed to DMEM + 10% FBS containing MG132 (0–2  $\mu$ M), and incubation was continued at 37 °C for 2 h. Cells were washed with DMEM twice and incubated with 1 ml of transfection solution containing pcDNA-EGFP (1  $\mu$ g) and MG132 (0–2  $\mu$ M) at 37 °C for 6 h. One ml of DMEM containing 20% FBS and MG132 (final concentration 0–2  $\mu$ M) was added to the cell culture, and incubation was continued at 37 °C for 16 h. After incubation, cells attached to and detached from the dish were recovered separately, combined, and washed with PBS twice. Cells were

plated onto a 35 mm non-coated glass bottom dish (Matsunami Glass) and observed on an Olympus IX81 microscope. Pictures of cells were taken both in phase contrast and fluorescence modes to count total and GFP positive cells. The fraction (%) of GFP positive cells was calculated as  $100 \times \text{GFP positive cells} / \text{total cells}$ .

**TABLE S1**  
**Proteins crosslinked to 150OXA**

| Abbreviation | Protein (CLP) <sup>a</sup> | Amino acids | MW    | Preparation <sup>b</sup> |
|--------------|----------------------------|-------------|-------|--------------------------|
| spermine     | spermine <sup>c</sup>      | —           | 202   | I                        |
| NEIL1-Δ1     | hNEIL1 (47–57)             | 11          | 1187  | II <sup>d</sup>          |
| platelet     | platelet factor-4          | 13          | 1573  | I                        |
| dynorphin    | dynorphin A                | 17          | 2148  | I                        |
| endorphin    | β-endorphin                | 31          | 3465  | I                        |
| midkine      | midkine (60–121)           | 62          | 6789  | II                       |
| NEIL1-Δ2     | hNEIL1 (30–128)            | 99          | 11089 | II <sup>d</sup>          |
| histone H2A  | histone H2A                | 130         | 14091 | II                       |
| NEIL1-Δ3     | hNEIL1 (30–155)            | 126         | 14317 | II <sup>d</sup>          |
| T4 endo V    | T4 endonuclease V          | 137         | 16046 | II                       |
| histone H1   | histone H1                 | 215         | 21841 | II                       |
| HMG1         | HMG1 protein               | 215         | 24907 | II                       |
| NEIL2        | hNEIL2 glycosylase         | 332         | 36825 | II                       |
| NEIL1        | hNEIL1 glycosylase         | 390         | 43710 | II                       |

<sup>a</sup> Parenthesized numbers indicate amino acid compositions of truncated proteins.

<sup>b</sup> Methods to prepare 150OXA-DPCs (see supplemental experimental procedures).

<sup>c</sup> Spermine is a polyamine.

<sup>d</sup> Including protease digestion after crosslinking reactions.

**TABLE S2**  
**Mammalian cells used in this study**

| Cell        | Mutation        | Repair defect          | Source and reference     |
|-------------|-----------------|------------------------|--------------------------|
| Human cells |                 |                        |                          |
| HeLa        | WT              | none                   | Lab stock                |
| MRC5SV      | WT              | none                   | Lab stock                |
| WI38VA13    | WT              | none                   | T. Yagi (2)              |
| XP12ROSV    | XPA             | NER                    | K. Tanaka (3)            |
| XP2OSSV     | XPA             | NER                    | K. Tanaka (4)            |
| XP4PASV     | XPC             | NER                    | T. Yagi (5)              |
| XP6BESV     | XPB             | NER                    | K. Tanaka (6)            |
| XP2YOSV     | XPF             | NER                    | T. Yagi (2)              |
| FAD423SVT   | FANCD1          | HR                     | K. Komatsu (unpublished) |
| FAD+BRCA2   | FANCD1+wtBRCA2  | complemented           | K. Komatsu (unpublished) |
| PD20F       | FANCD2          | HR                     | T. Taniguchi (7)         |
| PD20F+FAD2  | FANCD2+wtFANCD2 | complemented           | T. Taniguchi (7)         |
| AT5BIVA     | ATM             | cell cycle check point | Lab stock (8)            |
| AT5+YZ5     | ATM+wtATM       | complemented           | Lab stock (8)            |
| CHO cells   |                 |                        |                          |
| AA8         | WT              | none                   | Lab stock                |
| 51D1        | RAD51D          | HR                     | L.H. Thompson (9)        |
| 51D1.3      | RAD51D+wtRAD51D | complemented           | L.H. Thompson (9)        |
| irs1SF      | XRCC3           | HR                     | J. Thacker (10)          |
| V3          | DNA-PKcs        | NHEJ                   | L. Thompson (11)         |
| UV5         | ERCC2 (XPB)     | NER                    | A. Yasui (12)            |
| UV41        | ERCC4 (XPF)     | NER                    | A. Yasui (13)            |

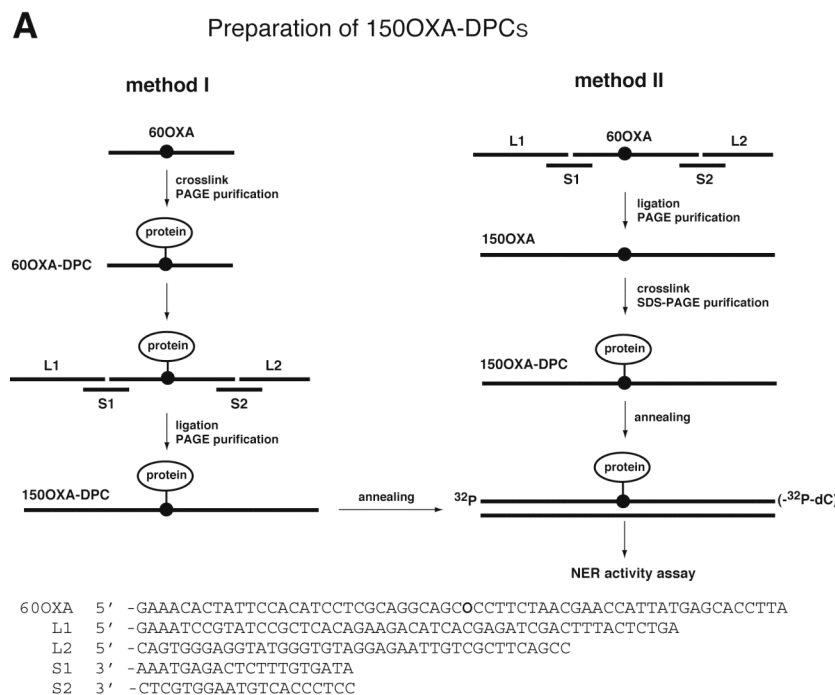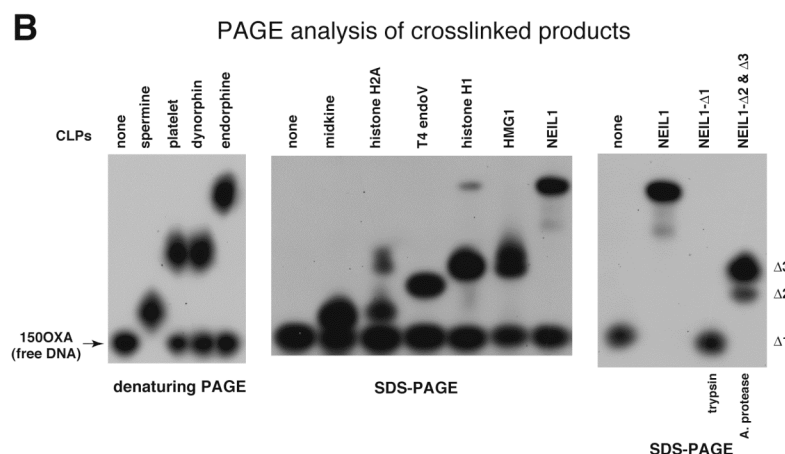

**FIGURE S1. Preparation and PAGE analysis of 150OXA-DPCs.**

*A*, Preparation of 150OXA-DPCs. 150OXA-DPCs containing small and large CLPs (Table S1) were prepared using methods I and II, respectively, as described in supplemental experimental procedures. Except for the final duplex, the 5'-end  $^{32}\text{P}$  (L1) and 3'-end  $^{32}\text{P}$ -dC (L2) labels are not shown in the scheme. *B*, PAGE analysis of 150OXA-DPCs. Typical gel separation data of 150OXA-DPCs after crosslinking reactions (left and middle panels) or protease digestion (right panel) are shown. The strand containing DPCs (150OXA) was 5'-end  $^{32}\text{P}$  labeled.

## SUPPLEMENTAL RESULTS

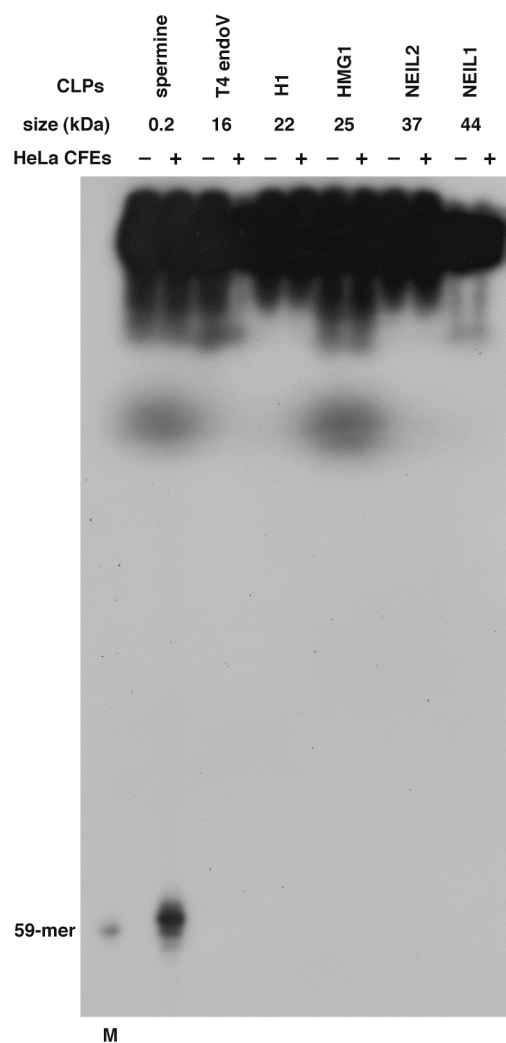

**FIGURE S2. DPC Substrates containing large CLPs are not incised by NER.**

150OXA-DPCs containing the indicated CLPs were 5'-end  $^{32}\text{P}$  labeled, and duplex substrates (2 nM) were incubated with HeLa CFEs (100  $\mu\text{g}$ ) at 30 °C for 30 min (14). The sample was treated with proteinase K, and products were separated by 10% denaturing PAGE. The leftmost lane indicates a 59-mer marker. No incision occurred for 150OXA-DPCs with large CLPs (T4 endo V, histone H1, HMG1, NEIL2, and NEIL1).

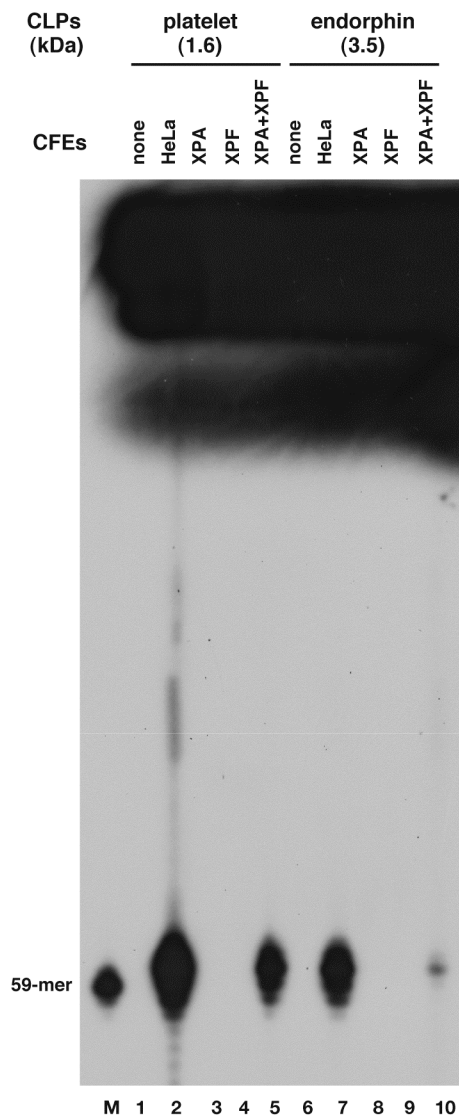

**FIGURE S3. NER incision activity for DPCs is restored when CFEs from XPA and XPF cells are combined.**

150OXA-DPCs containing platelet or endorphin were 5'-<sup>32</sup>P end labeled, and duplex substrates (2 nM) were incubated with CFEs from HeLa, XPA, and XPF cells (100 µg), or with those from XPA+XPF cells (50 µg each) at 30 °C for 30 min (14). The sample was treated with proteinase K, and products were separated by 10% denaturing PAGE. The leftmost lane indicates a 59-mer marker. No incision occurred for 150OXA-DPCs with CFEs from XPA and XPF cells alone (lanes 3, 4, 8, and 9), but incision occurred with CFEs from XPA + XPF cells (lanes 5 and 10), demonstrating that the incision activity was attributable to NER. The gel was overexposed to show the faint incision band for combined CFEs (lane 10). The yields of incision products for platelet and endorphin with HeLa CFEs (lanes 2 and 7) were comparable to those shown in Fig. 1B.

## A Cell treatment protocol

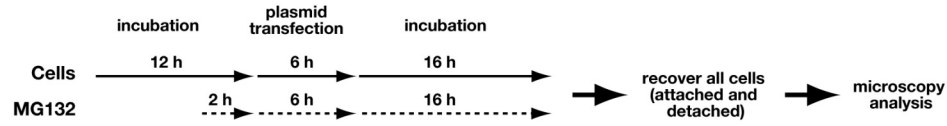

## B Typical views of transfected cells

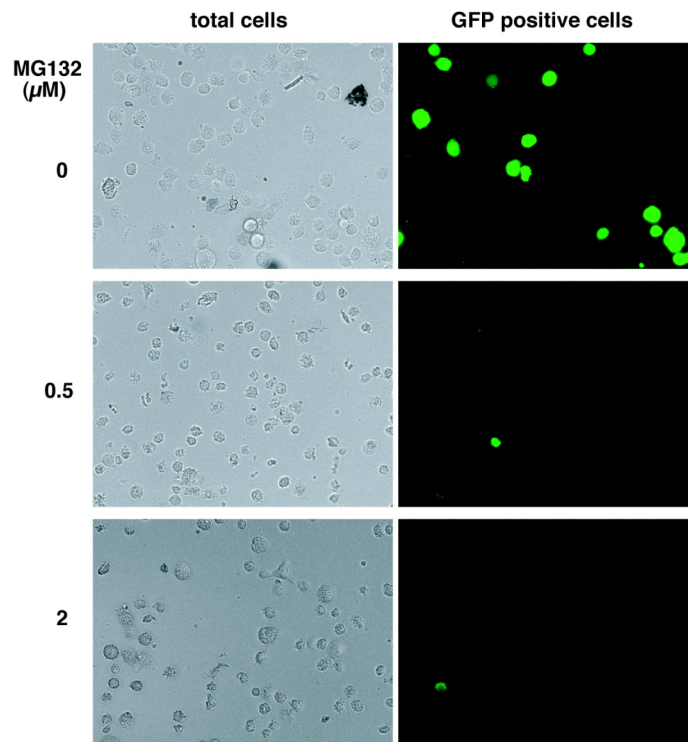

## C Fraction of GFP positive cells

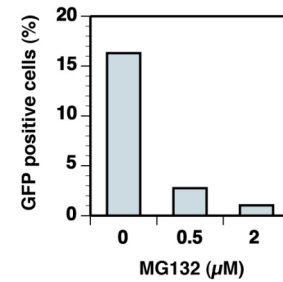

**FIGURE S4. Proteasome inhibitor MG132 impairs the transfection of intact GFP plasmid.**

*A*, Protocol of cell treatment. pcDNA-EGFP was transfected into WI38VA13 cells in the presence or absence of the indicated concentrations of MG132 as described in supplemental experimental procedures. After 16 h of transfection, total and GFP positive cells were analyzed. *B*, Typical views of cells observed in phase contrast (total cells) and fluorescence (GFP positive cells) modes. *C*, Fractions (%) of GFP positive cells. The fraction of GFP positive cells decreased markedly in the presence of MG132. Data points are means of two independent experiments.

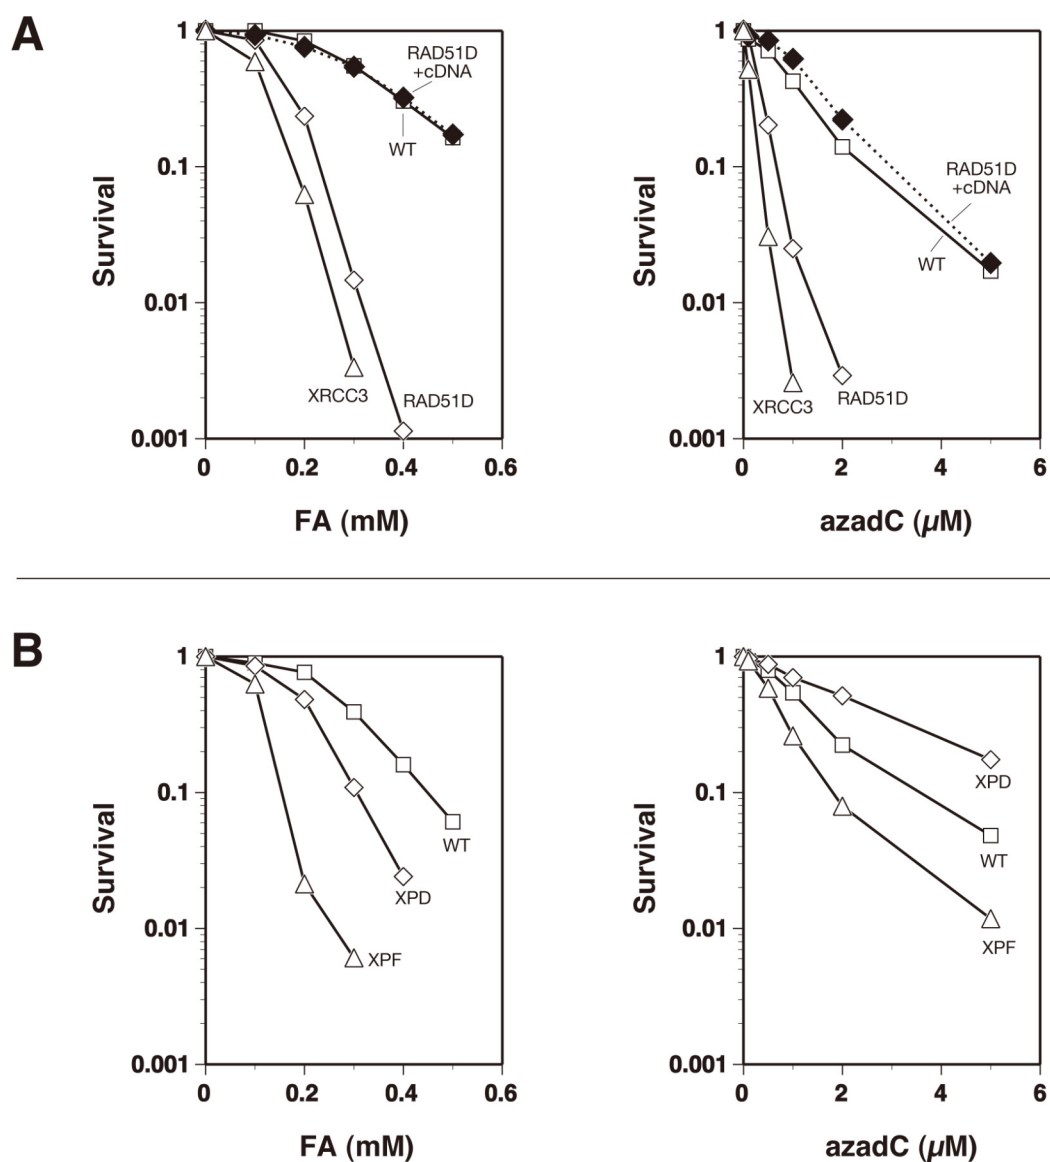

**FIGURE S5. Survival curves of repair-deficient CHO cells treated with FA or azadC.**

*A*, Survival curves of HR-deficient cells. AA8 (WT), 51D1 (RAD51D), 51D1.3 (complemented with hamster RAD51D cDNA), and irs1SF (XRCC3). Cells were treated with the indicated concentrations of FA or azadC, and survival was measured by colony formation. Data points are means of three independent experiments. *B*, Survival curves of NER-deficient cells. AA8 (WT), UV5 (ERCC2/XPD), and UV41 (ERCC4/XPF). Cells were treated as in *A*.

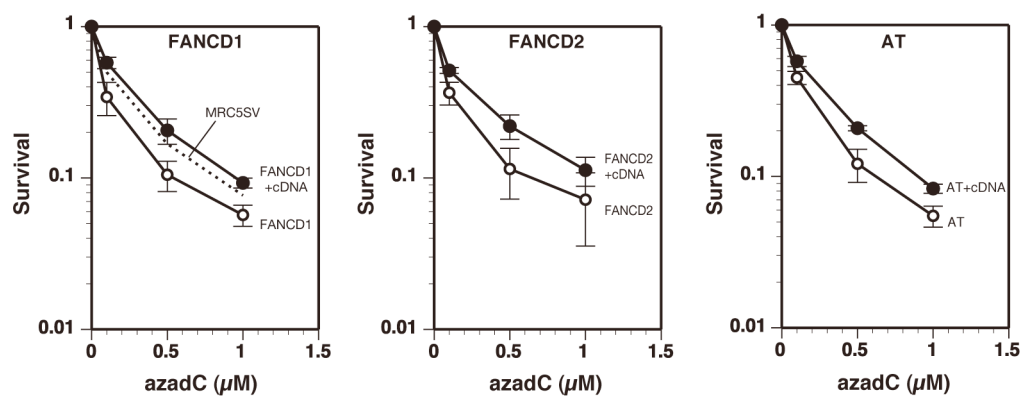

**FIGURE S6. Survival of FANCD1, FANCD2, and AT cells treated with azadC.**

Cells defective in the indicated gene (open symbols), those complemented with respective cDNA (closed symbols), and WT MRC5SV cells (no symbols) were treated with the indicated concentrations of azadC. Cell survival was assayed by colony formation. Data points are means of three or four independent experiments with standard deviation.

## SUPPLEMENTAL REFERENCES

1. Nakano, T., Morishita, S., Katafuchi, A., Matsubara, M., Horikawa, Y., Terato, H., Salem, A. M., Izumi, S., Pack, S. P., Makino, K., and Ide, H. (2007) *Mol. Cell* **28**, 147-158
2. Yagi, T., Tatsumi-Miyajima, J., Sato, M., Kraemer, K. H., and Takebe, H. (1991) *Cancer Res.* **51**, 3177-3182
3. Kobayashi, T., Takeuchi, S., Saijo, M., Nakatsu, Y., Morioka, H., Otsuka, E., Wakasugi, M., Nikaido, O., and Tanaka, K. (1998) *Nucleic Acids Res.* **26**, 4662-4668
4. Tanaka, K., Satokata, I., Ogita, Z., Uchida, T., and Okada, Y. (1989) *Proc. Natl. Acad. Sci. U.S.A.* **86**, 5512-5516
5. Yagi, T., Sato, M., Tatsumi-Miyajima, J., and Takebe, H. (1992) *Mutat. Res.* **273**, 213-220
6. Masutani, C., Sugasawa, K., Yanagisawa, J., Sonoyama, T., Ui, M., Enomoto, T., Takio, K., Tanaka, K., van der Spek, P. J., Bootsma, D., and et al. (1994) *EMBO J.* **13**, 1831-1843
7. Nakanishi, K., Yang, Y. G., Pierce, A. J., Taniguchi, T., Digweed, M., D'Andrea, A. D., Wang, Z. Q., and Jasin, M. (2005) *Proc. Natl. Acad. Sci. U.S.A.* **102**, 1110-1115
8. Sakamoto, S., Iijima, K., Mochizuki, D., Nakamura, K., Teshigawara, K., Kobayashi, J., Matsuura, S., Tauchi, H., and Komatsu, K. (2007) *Oncogene* **26**, 6002-6009
9. Hinz, J. M., Tebbs, R. S., Wilson, P. F., Nham, P. B., Salazar, E. P., Nagasawa, H., Urbin, S. S., Bedford, J. S., and Thompson, L. H. (2006) *Nucleic Acids Res.* **34**, 1358-1368
10. Fuller, L. F., and Painter, R. B. (1988) *Mutat. Res.* **193**, 109-121
11. Blunt, T., Finnie, N. J., Taccioli, G. E., Smith, G. C., Demengeot, J., Gottlieb, T. M., Mizuta, R., Varghese, A. J., Alt, F. W., Jeggo, P. A., and et al. (1995) *Cell* **80**, 813-823
12. Weber, C. A., Salazar, E. P., Stewart, S. A., and Thompson, L. H. (1988) *Mol. Cell. Biol.* **8**, 1137-1146
13. Thompson, L. H., Brookman, K. W., Weber, C. A., Salazar, E. P., Reardon, J. T., Sancar, A., Deng, Z., and Siciliano, M. J. (1994) *Proc. Natl. Acad. Sci. U.S.A.* **91**, 6855-6859
14. Nakano, T., Katafuchi, A., Shimizu, R., Terato, H., Suzuki, T., Tauchi, H., Makino, K., Skorvaga, M., Van Houten, B., and Ide, H. (2005) *Nucleic Acids Res.* **33**, 2181-2191
